# Supplementary material for: The anisotropic properties of granites – effects of tectonic emplacement mode on potential crystalline host rocks for nuclear waste deposits in Germany
Source: Copernicus journal article supplement (doi:10.5194/sand-1-67-2021), 2021-11-10
Supplement: Supplementary file 1 [file sand-1-67-2021-supplement.pdf]

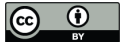

*Supplement of*

**The anisotropic properties of granites – effects of tectonic emplacement mode on potential crystalline host rocks for nuclear waste deposits in Germany**

**Uwe Kroner et al.**

*Correspondence to:* Uwe Kroner ([kroner@geo.tu-freiberg.de](mailto:kroner@geo.tu-freiberg.de))

The copyright of individual parts of the supplement might differ from the article licence.



## THE ANISOTROPIC PROPERTIES OF GRANITES

## Effects of tectonic emplacement mode on potential crystalline host rocks for nuclear waste deposits in Germany

Uwe Kroner<sup>1</sup>, Peter Hallas<sup>2</sup>, Franz Müller<sup>1</sup><sup>1

<sup>2

For permanent nuclear waste disposals sites, crystalline rocks, and especially granite is considered as an appropriate host rock. Three principal types of granitic plutons occur in the extra-alpine crystalline basement of Germany, which were consolidated during the late Paleozoic Variscan orogeny of Central Europe.

- Pre-Variscan** voluminous granodiorites that are hardly affected by subsequent continent – continent collision.
- Voluminous granites in various tectonic settings intruded during the **late-orogenic** stage of the Variscides.
- Post-orogenic** granites related to vast Permian intracontinental extension.

Fig. 1: Overview map of the felsic plutonites of Germany which are not covered.

Although it can be expected that different tectonic environments cause significant differences of the material properties, for Germany, however, there is no systematic study regarding the fabric of such plutonites. In order to find the most suitable “granite” we will investigate the primary anisotropy of granites evolved during the emplacement and crystallization of the melt. For this we sample rocks of all three principal types and various syn-intrusive tectonic settings, i.e., compression, extension, strike-slip, transtension and transpression.

By means of combined measurements of the “Anisotropy of the Magnetic Susceptibility” (AMS) and the “Shape Preferred Orientation” (SPO) we characterize the syn-intrusive flow pattern, i.e., the magmatic foliation and lineation. The **Crystallographic Preferred Orientation (CPO)** will be analyzed by the combination of neutron time-of-flight (ToF) experiments and electron backscatter diffraction (EBSD) measurements at the Frank Laboratory of Neutron Physics at JINR, Dubna, Russia and the TU Bergakademie Freiberg, respectively. This allows to obtain a wide range of texture information, from volume (~60 cm<sup>3</sup>) to spatially resolved at sub-grain scale. Special attention lies on the systematic mapping of annealed microcracks evolved during late magmatic fluid escape and/or post-crystallization hydrothermal activity. These datasets will be organized in a geoscientific information system (GIS) allowing for a complete traceability of the different investigation steps. In a second step we compare the primary anisotropy with the post-magmatic fracture pattern of the particular granites. Those fractures constitute probable fluid pathways and, thus, the first order risk for a potential permanent nuclear waste disposal. Conclusions on the (re-)activation conditions of cracks derived from these datasets provide the basis for the future detailed exploration.

Fig. 2: Potential fluid pathways within granitic host rocks resulting from extensional fracturing are highly dependent on the anisotropic fabric of the granitic material. It is determined by various geological processes such as magmatic flow, static crystallisation, plastic deformation, post-intrusive hydrothermal processes, etc.

Primary Anisotropy

Fig. 3: Strongly aligned magmatic flow fabric of a granite, Land's End, Cornwall, England.

Fig. 4: Seemingly isotropic fabric of the Niederboblitzsch granite. Despite the optical appearance granites are primarily anisotropic (Bouchez 1997).

Fig. 5 Stereograms of magnetic foliations and magnetic lineations resulting from AMS measurements (Grimmer et al. 2016).

Fig. 6 (above): Quartz volume texture of the Niederboblitzsch granite resulting from neutron diffraction experiments at SKAT (JINR, Dubna, Russia).

Fig. 7 (left): Calculation of anisotropic seismic properties from texture data (see Mainprice et al. 2011). Displayed are P- and S-wave velocities of quartz crystal orientations of the Niederboblitzsch granite.

Late- to Postmagmatic Anisotropy

Fig. 8 (left): Niederboblitzsch granite, fractures with alteration zones (annealed) and open, younger fractures.

Fig. 9 (above and right): Structural data of brittle deformation of the Eibenstock granite: faults (a), the interpretation of the fault network (b) and joints (c).

Workflow

```
graph TD
    subgraph Preliminary_work [Preliminary work]
        A[Literature and data research  
focus:  
- analysis of metadata  
- fracture data  
- texture data]
        B[Field work and sample preparation  
structural geological characterization of granites  
- deformation at the contact of intrusion  
- intrusion sequences  
- internal deformation  
- measurement of fractures  
sampling and preparation  
- geographically oriented sampling  
- polished sections & thin sections (EBSD/MLA)  
- cylinders (SKAT - Neutron diffraction)]
    end

    subgraph Texture_analysis [Texture-analysis]
        C[I Volume texture  
Neutron-diffraction experiments  
volume texture (cylinder) of all rock-building mineral phases: whole rock texture]
        D[II Local texture  
Optical microscopy/MLA/CL  
microstructural analysis of fractures  
MLA: phase analysis  
CL: annealing of micro fractures, magmatic vs. hydrothermal]
        E[EBSD/BSE  
spatially resolved measurements of local textures, focus on microfractures (paleo and active fluid networks)]
    end

    subgraph Anisotropy_analysis [Anisotropy analysis]
        F[Modeling of physical properties  
theoretical whole rock anisotropy: magnetic susceptibility, young's-modulus, P- and S-wave velocities, compressive and tensile strength]
        G[AMS measurements of the anisotropy of magnetic susceptibility]
        H[Local anisotropy  
- joint and fracture network  
- crystal orientation and fracture patterns  
- conditions for microfracture activation  
- other anisotropies, magmatic foliation, shear bands etc.]
    end

    subgraph Output [Output]
        I[Granite - Texture - Geodatabase  
compilation of literature data, structural data, texture data, modelled and measured physical anisotropies of a diverse set of german granites]
        J[Scientific publications]
        K[Fundamental granite dataset for further research  
e.g.  
- numerical flow modeling of fluids  
- data basis for the interpretation of seismic data]
    end

    A --> C
    B --> C
    B --> D
    B --> E
    C --> F
    D --> F
    E --> F
    F --> G
    G --> H
    H --> I
    H --> J
    H --> K
```

References

Bouchez, J.L., 1997, Granite is never isotropic: An introduction to AMS studies of granitic rocks, in Bouchez, J.L., Hutton, D., et al., eds., Granite: From Segregation of Melt to Emplacement Fabrics.: Dordrecht, Springer. Petrology and Structural Geology, Volume 8.

Grimmer, J.C., Ritter, J.R.R., Eisbacher, G.H., and Fielitz, W., 2017, The Late Variscan control on the location and asymmetry of the Upper Rhine Graben: International Journal of Earth Sciences, v. 106, no. 3, p. 827–853.

Mainprice, D., Hielscher, R., and Schaeben, H., 2011, Calculating anisotropic physical properties from texture data using the MTEX open-source package: Geological Society, London, Special Publications, v. 360, no. 1, p. 175-192.

Dr. Uwe Kroner

TU Bergakademie Freiberg | Department of Geology | Bernhard-von-Cotta-Str. 2 | 09599 Freiberg | kroner@geo.tu-freiberg.de | Interdisciplinary research symposium on the safety of nuclear disposal practices „safeND“  
10.-11.11.2021</sup></sup>
